# Supplementary material for: An explanation of the relationship between mass, metabolic rate and characteristic length for placental mammals
Source: PeerJ. 2015 Sep 3;3:e1228. doi: 10.7717/peerj.1228 (PMC4562252; doi:10.7717/peerj.1228)
Supplement: Data S1 [file peerj-03-1228-s001.xls]

## Sheet: Sheet1
Mass, shoulder height, head and body length from Nowak RM. (1999) Walker's Mammals of the World . Baltimore: John Hopkins.
						Common		Shoulder		Page
Order	Family	Genus	Species		Notes	Name	Mass (g)	Height(m)	Length(m)	Number
							W	l or lb	L
Carnivora	Canidae	Alopex	lagopus		lb about	Artic Fox	1400	0.28	0.458	644
Carnivora	Canidae	Alopex	lagopus			Artic Fox	9000	0.28	0.675
Carnivora	Canidae	Atelocynus	microtis			Small-eared dog	9000	0.356	0.72	653
Carnivora	Canidae	Atelocynus	microtis		lb about	Small-eared dog	10000	0.356	1
Carnivora	Canidae	Sprothos	venaticus			Bush Dog	5000	0.3	0.575	654
Carnivora	Canidae	Sprothos	venaticus		lb about	Bush Dog	7000	0.3	0.75
Carnivora	Canidae	Canis	adustus			side-striped Jackal	6500	0.41	0.65	656
Carnivora	Canidae	Canis	adustus			side-striped Jackal	14000	0.5	0.81
Carnivora	Canidae	Canis	mesomelas			Black-backed Jackal	6000	0.3	0.45	657
Carnivora	Canidae	Canis	mesomelas			Black-backed Jackal	13500	0.48	0.9
Carnivora	Canidae	Canis	aureus			Golden Jackal	7000	0.38	0.6	658
Carnivora	Canidae	Canis	aureus			Golden Jackal	15000	0.5	1.06
Carnivora	Canidae	Canis	simensis			Simien Jackal	11000	0.53	0.841	659
Carnivora	Canidae	Canis	simensis			Simien Jackal	19000	0.62	1.012
Carnivora	Canidae	Canis	rufus			Red Wolf	20000	0.66	1	663
Carnivora	Canidae	Canis	rufus			Red Wolf	40000	0.79	1.3
Carnivora	Canidae	Canis	familiaris			Dingo	10000	0.5	1.17	669
Carnivora	Canidae	Canis	familiaris		lb about	Dingo	20000	0.5	1.24
Carnivora	Canidae	Chrysocyon	brachyurus			Maned Wolf	20000	0.74	0.95	672
Carnivora	Canidae	Chrysocyon	brachyurus			Maned Wolf	26000	0.9	1.32
Carnivora	Canidae	Otocyon	megalotis			Bat-eared Fox	3000	0.3	0.46	673
Carnivora	Canidae	Otocyon	megalotis			Bat-eared Fox	5300	0.4	0.66
Carnivora	Canidae	Cuon	alpinus			Dhole	10000	0.42	0.88	674
Carnivora	Canidae	Cuon	alpinus			Dhole	21000	0.55	1.113
Carnivora	Canidae	Lycaon	pictus			African Hunting Dog	17000	0.61	0.76	676
Carnivora	Canidae	Lycaon	pictus			African Hunting Dog	36000	0.78	1.12
Carnivora	Ursidae	Tremarctos	ornatus			Spectacled Bear	60000	0.7	1.2	680
Carnivora	Ursidae	Tremarctos	ornatus			Spectacled Bear	140000	0.8	1.8
Carnivora	Ursidae	Ursus	americanus		lb up to	American Black Bear	270000	0.91	1.8	683
Carnivora	Ursidae	Ursus	arctos			Brown Bear	102000	0.9	1.7	685
Carnivora	Ursidae	Ursus	arctos			Brown Bear	780000	1.5	2.8
Carnivora	Ursidae	Ursus	martimus		lb up to	Polar Bear	800000	1.6	2.5	688
Carnivora	Ursidae	Ursus	malayanus			Malayan Sun Bear	27000	0.7	1	691
Carnivora	Ursidae	Ursus	malayanus		lb about	Malayan Sun Bear	65000	0.7	1.4
Carnivora	Ursidae	Ursus	ursinus			Sloth Bear	55000	0.61	1.4	692
Carnivora	Ursidae	Ursus	ursinus			Sloth Bear	145000	0.915	1.8
Carnivora	Procyonidae	Procyon	all 7			Raccoon	2000	0.228	0.415	698
Carnivora	Procyonidae	Procyon	all 7			Raccoon	12000	0.304	0.6
Carnivora	Procyonidae	Potos	flavus		lb as much as	Kinkajou	1400	0.254	0.405	702
Carnivora	Procyonidae	Potos	flavus			Kinkajou	4600	0.254	0.76
Carnivora	Procyonidae	Nasua	narica,nasua		lb up to	Coatis	3500	0.305	0.41	700
Carnivora	Procyonidae	Nasua	narica,nasua			Coatis	6000	0.305	0.67
Carnivora	Mustelidae	Gulo	gulo			Wolverine	7000	0.355	0.65	726
Carnivora	Mustelidae	Gulo	gulo			Wolverine	32000	0.432	1.05
Carnivora	Mustelidae	Mellivoracapensis				Honey Badger	7000	0.25	0.6	727
Carnivora	Mustelidae	Mellivoracapensis				Honey Badger	13000	0.3	0.77
Carnivora	Herpestidae	Cryptoprocta	ferox			Fossa	7000	0.37	0.61	785
Carnivora	Herpestidae	Cryptoprocta	ferox		lb about	Fossa	12000	0.37	0.8
Carnivora	Hyaenidae	Proteles	cristatus			Aardwolf	9000	0.45	0.55	786
Carnivora	Hyaenidae	Proteles	cristatus			Aardwolf	14000	0.5	0.8
Carnivora	Hyaenidae	Parahyaena	brunnea			Brown Hyena	37000	0.64	1.1	787
Carnivora	Hyaenidae	Parahyaena	brunnea			Brown Hyena	47500	0.88	1.356
Carnivora	Hyaenidae	Hyaena	hyaena			Striped Hyena	25000	0.6	1.036	790
Carnivora	Hyaenidae	Hyaena	hyaena			Striped Hyena	55000	0.942	1.19
Carnivora	Hyaenidae	Crocuta	crocuta			Spotted Hyena	40000	0.7	0.95	791
Carnivora	Hyaenidae	Crocuta	crocuta			Spotted Hyena	86000	0.915	1.658
Carnivora	Felidae	Felis	pardina			Spanish Lynx	9400	0.6	0.85	805
Carnivora	Felidae	Felis	pardina			Spanish Lynx	12900	0.7	1.1
Carnivora	Felidae	Felis	lynx			Eurasian Lynx	8000	0.6	0.8	806
Carnivora	Felidae	Felis	lynx			Eurasian Lynx	38000	0.75	1.3
Carnivora	Felidae	Felis	rufus			Bobcat	4100	0.45	0.65	809
Carnivora	Felidae	Felis	rufus			Bobcat	15300	0.58	1.05
Carnivora	Felidae	Felis	caracal			Caracal	6000	0.38	0.6	810
Carnivora	Felidae	Felis	caracal			Caracal	19000	0.5	0.915
Carnivora	Felidae	Felis	serval			Serval	8700	0.54	0.67	811
Carnivora	Felidae	Felis	serval			Serval	18000	0.62	1
Carnivora	Felidae	Felis	aurata			African Golden Cat	5300	0.38	0.616	812
Carnivora	Felidae	Felis	aurata			African Golden Cat	16000	0.51	1.016
Carnivora	Felidae	Felis	viverrina			Fishing Cat	7700	0.38	0.75	814
Carnivora	Felidae	Felis	viverrina			Fishing Cat	14000	0.406	0.86
Carnivora	Felidae	Felis	colocolo		W for 1	Pampas Cat	3000	0.3	0.435	815
Carnivora	Felidae	Felis	colocolo			Pampas Cat	3000	0.35	0.7
Carnivora	Felidae	Felis	concolor			Cougar	36000	0.6	1.959	818
Carnivora	Felidae	Felis	concolor			Cougar	103000	0.7	0.966
Carnivora	Felidae	Panthera	uncia		lb about	Snow Leopard	25000	0.6	1	824
Carnivora	Felidae	Panthera	uncia			Snow Leopard	75000	0.6	1.3
Carnivora	Felidae	Panthera	tigris			Tiger	65000	0.8	1.4	825
Carnivora	Felidae	Panthera	tigris			Tiger	306000	1.1	2.8
Carnivora	Felidae	Panthera	pardus			Leopard	28000	0.45	0.91	828
Carnivora	Felidae	Panthera	pardus			Leopard	90000	0.78	1.91
Carnivora	Felidae	Panthera	leo			Lion	250000	1.23	2.5	832
Carnivora	Felidae	Panthera	leo			Lion	82000	1.07	1.4
Carnivora	Felidae	Panthera	Acinonyx			Cheetah	21000	0.67	1.12	834
Carnivora	Felidae	Panthera	Acinonyx			Cheetah	72000	0.94	1.5
Perissodactyla	Equidae	Equus	asinus			African Wild Ass	250000	1.25	2	1011
Perissodactyla	Equidae	Equus	hemionus			Onager	200000	1	2	1013
Perissodactyla	Equidae	Equus	hemionus			Onager	260000	1.42	2.5
Perissodactyla	Equidae	Equus	kiang		avg mass	Kiang	325000	1.42	Not reported	1014
Perissodactyla	Equidae	Equus	caballus			Przewalski's Horse	200000	1.2	2.2	1015
Perissodactyla	Equidae	Equus	caballus			Przewalski's Horse	300000	1.46	2.8
Perissodactyla	Equidae	Equus	grevyi			Grevy's Zebra	352000	1.4	2.5	1018
Perissodactyla	Equidae	Equus	grevyi			Grevy's Zebra	450000	1.6	3
Perissodactyla	Equidae	Equus	zebra			Mountain Zebra	240000	1.16	2.1	1020
Perissodactyla	Equidae	Equus	zebra			Mountain Zebra	372000	1.5	2.6
Perissodactyla	Equidae	Equus	burchelli			Burchell's Zebra	175000	1.1	2.17	1021
Perissodactyla	Equidae	Equus	burchelli			Burchell's Zebra	385000	1.45	2.46
Perissodactyla	Tapiridae	Tapirus	All 4			Tapir	150000	0.73	1.8	1025
Perissodactyla	Tapiridae	Tapirus	All 4			Tapir	320000	1.2	2.5
Perissodactyla	Rhinocerotidae	Dicerorhinus	sumatrensis			Sumatran Rhinoceros	800000	1.12	2.36	1030
Perissodactyla	Rhinocerotidae	Dicerorhinus	sumatrensis			Sumatran Rhinoceros	1000000	1.45	3.18
Perissodactyla	Rhinocerotidae	Rhinoceros	sondaicus			Javan Rhinoceros	1500000	1.6	3	1032
Perissodactyla	Rhinocerotidae	Rhinoceros	sondaicus			Javan Rhinoceros	2000000	1.75	3.2
Perissodactyla	Rhinocerotidae	Rhinoceros	unicornis			Greater Indian Rhinoceros	1600000	1.48	3.1	1033
Perissodactyla	Rhinocerotidae	Rhinoceros	unicornis			Greater Indian Rhinoceros	1600000	1.73	3.4
Perissodactyla	Rhinocerotidae	Rhinoceros	unicornis			Greater Indian Rhinoceros	2200000	1.7	3.68
Perissodactyla	Rhinocerotidae	Rhinoceros	unicornis			Greater Indian Rhinoceros	2200000	1.86	3.8
Perissodactyla	Rhinocerotidae	Diceros	bicornis			Black Rhinoceros	800000	1.4	3	1034
Perissodactyla	Rhinocerotidae	Diceros	bicornis			Black Rhinoceros	1400000	1.8	3.75
Perissodactyla	Rhinocerotidae	Ceratotherium	simum		avg female mass	White Rhinoceros	1550000	1.5	3.35	1037
Perissodactyla	Rhinocerotidae	Ceratotherium	simum		avg male mass	White Rhinoceros	2800000	1.85	4.2
Proboscidea	Elephantidae	Elephas	maximus			Asiatic Elephant	2720000	2.5	5.5	994
Proboscidea	Elephantidae	Elephas	maximus			Asiatic Elephant	5400000	3	6.4
Proboscidea	Elephantidae	Loxodonta	africana		forest female mean heigth	African Elephant	2700000	2.1	no	998
Proboscidea	Elephantidae	Loxodonta	africana		forest male mean heigth	African Elephant	6000000	2.5	no
Proboscidea	Elephantidae	Loxodonta	africana		bush min female		2400000	2.4	no
Proboscidea	Elephantidae	Loxodonta	africana		bush max female		3500000	3.4	no
Proboscidea	Elephantidae	Loxodonta	africana		bush min male		4000000	3	no
Proboscidea	Elephantidae	Loxodonta	africana		bush max male		6300000	4	no
Artiodactyla	Bovidae	Bos	taurus			Domestic Cattle	450000	0.9	Not reported	1157
Artiodactyla	Bovidae	Bos	taurus			Domestic Cattle	1000000	1.1	Not reported
Artiodactyla	Hippotamidae	Hippopotamus	amphibius		l?	Hippopotamus	1000000	0.65	2.9	1068
Artiodactyla	Hippotamidae	Hippopotamus	amphibius		l?	Hippopotamus	4500000	1.5	5.05
Artiodactyla	Hippotamidae	Hexaprotodon	liberiensis			Pigmy Hippotamus	160000	0.75	1.5	1071
Artiodactyla	Hippotamidae	Hexaprotodon	liberiensis			Pigmy Hippotamus	270000	1	1.75
Artiodactyla	Tragulidae	Tragulus	javincus, napu			Asiatic Mouse Deer	700	0.2	0.4	1082
Artiodactyla	Tragulidae	Tragulus	javincus, napu			Asiatic Mouse Deer	8000	0.35	0.75
Artiodactyla	Giraffidae	Giraffa	camelopardalis			Giraffe	550000	2.5	Not reported	1086
Artiodactyla	Giraffidae	Giraffa	camelopardalis			Giraffe	1930000	3.7	4.724
Artiodactyla	Giraffidae	Okapia	johnstoni			Okapi	200000	1.5	1.97	1085
Artiodactyla	Giraffidae	Okapia	johnstoni			Okapi	300000	1.8	2.15
Artiodactyla	Suidae	Potamochoerus	porcus, larvatus			Red River, African Bush Hog	46000	0.585	1	1058
Artiodactyla	Suidae	Potamochoerus	porcus, larvatus			Red River, African Bush Hog	130000	0.965	1.5
Artiodactyla	Suidae	Hylochoerus	meinertzhageni			Giant Forest Hog	130000	0.762	1.3	1059
Artiodactyla	Suidae	Hylochoerus	meinertzhageni			Giant Forest Hog	275000	1.1	2.1
Artiodactyla	Suidae	Phacochoerus	africanus,aethiopicus			Wart Hog	50000	0.635	0.9	1060
Artiodactyla	Suidae	Phacochoerus	africanus,aethiopicus			Wart Hog	150000	0.85	1.5
Artiodactyla	Suidae	Babyrousa	babyrousa		to W	Babirusa	100000	0.8	1.065	1062
Artiodactyla	Tayassuidae	Catagonus	wagneri			Chacoan Peccary	29500	0.52	0.9	1064
Artiodactyla	Tayassuidae	Catagonus	wagneri			Chacoan Peccary	40000	0.69	1.112
Artiodactyla	Tayassuidae	Pecari	tajacu			Collared Peccary	14000	0.44	0.75	1065
Artiodactyla	Tayassuidae	Pecari	tajacu			Collared Peccary	30000	0.5	1
Artiodactyla	Tayassuidae	Tayassu	pecari			White-lipped Peccary	20000	0.44	0.9	1066
Artiodactyla	Tayassuidae	Tayassu	pecari			White-lipped Peccary	50000	0.6	1.3
Artiodactyla	Camelidae	Lama	guanicoe		l?	Guanaco	100000	0.9	1.2	1075
Artiodactyla	Camelidae	Lama	guanicoe		l?	Guanaco	120000	1.3	2.285
Artiodactyla	Camelidae	Lama	glama		l?	Llama	55000	0.9	1.2	1075
Artiodactyla	Camelidae	Lama	glama		W?	Llama	130000	1.3	2.285
Artiodactyla	Camelidae	Lama	pacos		l?	alpaca	55000	0.9	1.2	1075
Artiodactyla	Camelidae	Lama	pacos		l?	alpaca	65000	1.3	2.285
Artiodactyla	Camelidae	Vicugna	vicugna			Vicuna	35000	0.7	1.25	1077
Artiodactyla	Camelidae	Vicugna	vicugna			Vicuna	65000	1.1	1.9
Artiodactyla	Camelidae	Camelus	bactrianus,dromedarius			Bactrian,Dromrdary	300000	1.8	2.25	1078
Artiodactyla	Camelidae	Camelus	bactrianus,dromedarius				690000	2.3	3.45
Artiodactyla	Tragulidae	Hyemoschus	aquaticus			Water Chevrotain	7000	0.305	0.6	1081
Artiodactyla	Tragulidae	Hyemoschus	aquaticus		l?	Water Chevrotain	15000	0.355	0.85
Artiodactyla	Tragulidae	Moschiola	meminna			Indian Spotted Chevrotain	2200	0.25	0.46	1082
Artiodactyla	Tragulidae	Moschiola	meminna			Indian Spotted Chevrotain	2700	0.3	0.6
Artiodactyla	Moschidae	Moschus	all 5			Musk Deer	7000	0.5	0.7	1089
Artiodactyla	Moschidae	Moschus	all 5			Musk Deer	18000	0.8	1
Artiodactyla	Cervidae	Hydropotes	inermis			Chinese Water Deer	11000	0.45	0.775	1093
Artiodactyla	Cervidae	Hydropotes	inermis			Chinese Water Deer	14000	0.55	1
Artiodactyla	Cervidae	Elaphodus	cephalopus			Tuffed Deer	17000	0.5	1.1	1094
Artiodactyla	Cervidae	Elaphodus	cephalopus			Tuffed Deer	50000	0.7	1.6
Artiodactyla	Cervidae	Muntiacus	all 6			Muntjacs	14000	0.406	0.64	1094
Artiodactyla	Cervidae	Muntiacus	all 6			Muntjacs	33000	0.78	1.35
Artiodactyla	Cervidae	Megamuntiacus	vuquangensis			Giant Muntjac	34000	0.67	0.96	1096
Artiodactyla	Cervidae	Dama	dama			Fallow Deer	40000	0.8	1.3	1098
Artiodactyla	Cervidae	Dama	dama			Fallow Deer	100000	1.05	1.75
Artiodactyla	Cervidae	Axis	all 4			Axis Deer	27000	0.6	1	1100
Artiodactyla	Cervidae	Axis	all 4			Axis Deer	110000	1	1.75
Artiodactyla	Cervidae	Cervus	unicolor			Sambar	109000	1.02	1.62	1104
Artiodactyla	Cervidae	Cervus	unicolor			Sambar	260000	1.6	2.46
Artiodactyla	Cervidae	Cervus	timorensis			Sunda Sambar	50000	0.83	1.42	1105
Artiodactyla	Cervidae	Cervus	timorensis			Sunda Sambar	115000	1.1	1.85
Artiodactyla	Cervidae	Cervus	mariannus			Phillipine Sambar	40000	0.55	1	1106
Artiodactyla	Cervidae	Cervus	mariannus			Phillipine Sambar	60000	0.7	1.51
Artiodactyla	Cervidae	Alces	alces			Moose	200000	1.4	2.4	1126
Artiodactyla	Cervidae	Alces	alces			Moose	825000	2.35	3.1
Artiodactyla	Cervidae	Cervus	duvaucelli			Barasingha	172000	1.19	Not reported	1106
Artiodactyla	Cervidae	Cervus	duvaucelli		W typo?	Barasingha	181000	1.24	Not reported
Artiodactyla	Cervidae	Cervus	eldii			Thamin	95000	1.2	1.5	1108
Artiodactyla	Cervidae	Cervus	eldii			Thamin	150000	1.3	1.7
Artiodactyla	Cervidae	Cervus	elaphus			Wapiti	75000	0.75	1.65	1110
Artiodactyla	Cervidae	Cervus	elaphus			Wapiti	340000	1.5	2.65
Artiodactyla	Cervidae	Elaphurus	davidianus			Pere Dacid's Deer	214000	1.22	1.83
Artiodactyla	Cervidae	Elaphurus	davidianus			Pere Dacid's Deer	159000	1.37	2.16
Artiodactyla	Cervidae	Odocoileus	hemionus			Mule Deer	150000	1	Not reported	1114
Artiodactyla	Cervidae	Odocoileus	hemionus			Mule Deer	75000	1	Not reported
Artiodactyla	Cervidae	Odocoileus	virginianus			White-tailed Deer	150000	1	Not reported	1114
Artiodactyla	Cervidae	Odocoileus	virginianus			White-tailed Deer	100000	1	Not reported
Artiodactyla	Cervidae	Odocoileus	virginianus			White-tailed Deer	100000	0.9	Not reported
Artiodactyla	Cervidae	Odocoileus	virginianus			White-tailed Deer	50000	0.9	Not reported
Artiodactyla	Cervidae	Odocoileus	virginianus			White-tailed Deer	55000	0.8	Not reported
Artiodactyla	Cervidae	Odocoileus	virginianus			White-tailed Deer	30000	0.8	Not reported
Artiodactyla	Cervidae	Odocoileus	virginianus			White-tailed Deer	36000	0.625	Not reported
Artiodactyla	Cervidae	Odocoileus	virginianus			White-tailed Deer	18000	0.55	0.85
Artiodactyla	Cervidae	Odocoileus	virginianus			White-tailed Deer	215000	1.1	2.1
Artiodactyla	Cervidae	Blastocerus	dichotomus			Marsh Deer	80000	1.1	1.53	1118
Artiodactyla	Cervidae	Blastocerus	dichotomus			Marsh Deer	150000	1.27	1.95	1119
Artiodactyla	Cervidae	Ozotoceros	bezoarticus			Pampas Deer	25000	0.7	1.1
Artiodactyla	Cervidae	Ozotoceros	bezoarticus			Pampas Deer	40000	0.75	1.4
Artiodactyla	Cervidae	Hippocamelus	all 2			Guemals	45000	0.775	1.4	1122
Artiodactyla	Cervidae	Hippocamelus	all 2			Guemals	65000	0.9	1.65
Artiodactyla	Cervidae	Mazama	all 4			Brocket Deer	8000	0.35	0.72	1123
Artiodactyla	Cervidae	Mazama	all 4			Brocket Deer	25000	0.75	1.35
Artiodactyla	Cervidae	Pudu	all 2			Pudus	5800	0.25	0.6	1126
Artiodactyla	Cervidae	Pudu	all 2			Pudus	13400	0.43	0.825
Artiodactyla	Cervidae	Randifer	tarandus			Caribou	60000	0.87	1.2	1128
Artiodactyla	Cervidae	Randifer	tarandus			Caribou	318000	1.4	2.2
Artiodactyla	Cervidae	Capreolus	all 2			Roe Deer	15000	0.65	0.95	1131
Artiodactyla	Cervidae	Capreolus	all 2			Roe Deer	50000	1	1.51
Artiodactyla	Antilocapridae	Antilocapra	americana			Pronghorn	36000	0.81	1	1133
Artiodactyla	Antilocapridae	Antilocapra	americana			Pronghorn	70000	1.04	1.5
Artiodactyla	Bovidae	Tragelaphus	spekeii			Sitatunga	50000	0.75	1.15	1136
Artiodactyla	Bovidae	Tragelaphus	spekeii			Sitatunga	125000	1.25	1.7
Artiodactyla	Bovidae	Tragelaphus	angasii			Nyala	55000	0.8	1.35	1137
Artiodactyla	Bovidae	Tragelaphus	angasii			Nyala	127000	1.21	1.55
Artiodactyla	Bovidae	Tragelaphus	scriptus			Bushback	24000	0.65	1.05	1137
Artiodactyla	Bovidae	Tragelaphus	scriptus			Bushback	77000	1.1	1.5
Artiodactyla	Bovidae	Tragelaphus	strepsiceros			Greater Kudu	120000	1	1.95	1137
Artiodactyla	Bovidae	Tragelaphus	strepsiceros			Greater Kudu	315000	1.5	2.45
Artiodactyla	Bovidae	Tragelaphus	imberbis			Lesser Kudu	60000	0.9	1.1	1141
Artiodactyla	Bovidae	Tragelaphus	imberbis			Lesser Kudu	100000	1.05	1.75
Artiodactyla	Bovidae	Tragelaphus	eurycerus			Bongo	150000	1.1	1.7	1142
Artiodactyla	Bovidae	Tragelaphus	eurycerus			Bongo	220000	1.4	2.5
Artiodactyla	Bovidae	Taurotragus	oryx,derbianus			Eland	400000	1	1.8	1143
Artiodactyla	Bovidae	Taurotragus	oryx,derbianus			Eland	1000000	1.8	3.45
Artiodactyla	Bovidae	Boselaphus	tragocamelus			Nilgai	169000	1.2	1.8	1145
Artiodactyla	Bovidae	Boselaphus	tragocamelus			Nilgai	241000	1.5	2.1
Artiodactyla	Bovidae	Tetracerus	quadricornus			Four Horned Antelope	17000	0.6	0.8	1146
Artiodactyla	Bovidae	Tetracerus	quadricornus			Four Horned Antelope	21000	0.6	1
Artiodactyla	Bovidae	Bubalus	bubalis			Asian Water Buffalo	700000	1.5	2.4	1148
Artiodactyla	Bovidae	Bubalus	bubalis			Asian Water Buffalo	1200000	1.9	3
Artiodactyla	Bovidae	Bubalus	mindorenis			Tamaraw	220000	1	2.2	1149
Artiodactyla	Bovidae	Bubalus	mindorenis			Tamaraw	300000	1	2.2
Artiodactyla	Bovidae	Bubalus	depressicornis,quarlesi			Lowland,Mountain Anoa	150000	0.69	1.6	1149
Artiodactyla	Bovidae	Bubalus	depressicornis,quarlesi			Lowland,Mountain Anoa	300000	1.06	1.72
Artiodactyla	Bovidae	Syncerus	caffer			African Buffalo	300000	1	2.1	1151
Artiodactyla	Bovidae	Syncerus	caffer			African Buffalo	900000	1.7	3.4
Artiodactyla	Bovidae	Bos	javanicus			Banteng	400000	1.2	1.8	1157
Artiodactyla	Bovidae	Bos	javanicus			Banteng	900000	1.9	2.25
Artiodactyla	Bovidae	Bos	gaurus			Gaur	650000	1.65	2.5	1158
Artiodactyla	Bovidae	Bos	gaurus			Gaur	1000000	2.2	3.3
Artiodactyla	Bovidae	Bos	sauveli			Kouprey	700000	1.71	2.1	1159
Artiodactyla	Bovidae	Bos	sauveli			Kouprey	900000	1.9	2.225
Artiodactyla	Bovidae	Bos	grunninens		l&L to	Yak	1000000	2	3.25	1160
Artiodactyla	Bovidae	Bison	bonasus,bison			European,American Bison	350000	1.5	2.1	1161
Artiodactyla	Bovidae	Bison	bonasus,bison			European,American Bison	1000000	2	3.5
Artiodactyla	Bovidae	Cephalophus	monticola			Duikers	3500	0.35	0.6	1165
Artiodactyla	Bovidae	Cephalophus	monticola			Duikers	9000	0.41	0.65
Artiodactyla	Bovidae	Cephalophus	sylvicultor			Duikers	45000	0.7	1.5	1165
Artiodactyla	Bovidae	Cephalophus	sylvicultor			Duikers	80000	0.87	1.9
Artiodactyla	Bovidae	Sylvicapra	grimmia			Gray Duiker	12000	0.45	0.7	1165
Artiodactyla	Bovidae	Sylvicapra	grimmia			Gray Duiker	25000	0.7	1.15
Artiodactyla	Bovidae	Kubus	all 5			Waterbuck,etc	50000	0.7	1.25	1166
Artiodactyla	Bovidae	Kubus	all 5			Waterbuck,etc	300000	1.36	2.35
Artiodactyla	Bovidae	Redunca	all 3			Reedbucks	19000	0.6	1.1	1170
Artiodactyla	Bovidae	Redunca	all 3			Reedbucks	95000	1.05	1.6
Artiodactyla	Bovidae	Pelea	capreolus			Rhebok	20000	0.71	1.15	1172
Artiodactyla	Bovidae	Pelea	capreolus			Rhebok	30000	0.87	1.25
Artiodactyla	Bovidae	Hippotragus	all 3			Roan,Sable Antelopes	150000	1	1.88	1174
Artiodactyla	Bovidae	Hippotragus	all 3			Roan,Sable Antelopes	300000	1.6	2.67
Artiodactyla	Bovidae	Oryx	all 3			Oryx,Gemsbok	100000	0.9	1.53	1175
Artiodactyla	Bovidae	Oryx	all 3			Oryx,Gemsbok	210000	1.4	2.53
Artiodactyla	Bovidae	Damaliscus	all 3			Sassabies	68000	0.88	1.2	1179
Artiodactyla	Bovidae	Damaliscus	all 3			Sassabies	155000	1.34	2.05
Artiodactyla	Bovidae	Addax	nasomaculus			Addax	60000	0.95	1.5	1178
Artiodactyla	Bovidae	Addax	nasomaculus			Addax	125000	1.15	1.7
Artiodactyla	Bovidae	Damaliscus	all 3			Sassabies	68000	0.88	1.2	1179
Artiodactyla	Bovidae	Damaliscus	all 3			Sassabies	155000	1.34	2.05
Artiodactyla	Bovidae	Acelaphus	buselaphus			Hartebeest	100000	1.1	1.5	1181
Artiodactyla	Bovidae	Acelaphus	buselaphus			Hartebeest	225000	1.5	2.45
Artiodactyla	Bovidae	Sigmoceros	lichtenstenii			Lichtenstein's Hartebeest	81000	1.19	1.6	1183
Artiodactyla	Bovidae	Sigmoceros	lichtenstenii			Lichtenstein's Hartebeest	204000	1.36	2.03
Artiodactyla	Bovidae	Connochaetes	gnou,taurinus			Wildebeests	118000	1	1.5	1184
Artiodactyla	Bovidae	Connochaetes	gnou,taurinus			Wildebeests	275000	1.45	2.4
Artiodactyla	Bovidae	Oreotragus	oreotragus			Klipspringer	8000	0.45	0.77	1186
Artiodactyla	Bovidae	Oreotragus	oreotragus			Klipspringer	18000	0.6	1.15
Artiodactyla	Bovidae	Ourebia	ourebi			Oribi	14000	0.5	0.92	1187
Artiodactyla	Bovidae	Ourebia	ourebi			Oribi	21000	0.7	1.4
Artiodactyla	Bovidae	Raphicerus	all 3			Steenbok,Grysboks	7000	0.45	0.61	1188
Artiodactyla	Bovidae	Raphicerus	all 3			Steenbok,Grysboks	16000	0.6	0.95
Artiodactyla	Bovidae	Neotragus	batesi			Bate's Dwarf Antelope	2000	0.24	0.5	1189
Artiodactyla	Bovidae	Neotragus	batesi			Bate's Dwarf Antelope	3000	0.33	0.575
Artiodactyla	Bovidae	Neotragus	moschatus			Suni	4000	0.3	0.58	1189
Artiodactyla	Bovidae	Neotragus	moschatus			Suni	9000	0.41	0.62
Artiodactyla	Bovidae	Madoqua	all 4			Dik-diks	3000	0.305	0.52	1191
Artiodactyla	Bovidae	Madoqua	all 4			Dik-diks	7000	0.43	0.72
Artiodactyla	Bovidae	Dorcatragus	megalotis			Beira	9000	0.5	0.762	1193
Artiodactyla	Bovidae	Dorcatragus	megalotis			Beira	11000	0.76	0.865
Artiodactyla	Bovidae	Antilope	cervicapra		L about	Blackbuck	32000	0.737	1.2	1193
Artiodactyla	Bovidae	Antilope	cervicapra		L about	Blackbuck	43000	0.838	1.2
Artiodactyla	Bovidae	Aepyceros	melampus			Impala	40000	0.775	1.1	1195
Artiodactyla	Bovidae	Aepyceros	melampus			Impala	65000	1	1.5
Artiodactyla	Bovidae	Ammodorcas	clarkei			Dibitag	22000	0.8	1.52	1196
Artiodactyla	Bovidae	Ammodorcas	clarkei			Dibitag	35000	0.88	1.68
Artiodactyla	Bovidae	Litocranius	walleri			Gerenuk	28000	0.8	1.4	1197
Artiodactyla	Bovidae	Litocranius	walleri			Gerenuk	52000	1.05	1.6
Artiodactyla	Bovidae	Gazella	all 16			Gazelles	12000	0.5	0.85	1199
Artiodactyla	Bovidae	Gazella	all 16			Gazelles	85000	1.1	1.7
Artiodactyla	Bovidae	Antidorcas	marsupialis			Springbuck	30000	0.73	1.2	1202
Artiodactyla	Bovidae	Antidorcas	marsupialis			Springbuck	48000	0.87	1.4
Artiodactyla	Bovidae	Procapra	all 3			Central Asian Gazelles	20000	0.54	0.95	1203
Artiodactyla	Bovidae	Procapra	all 3			Central Asian Gazelles	40000	0.84	1.48
Artiodactyla	Bovidae	Pantholops	hodgsoni		L inferred	Chiru-males	36000	0.79	1.3	1205
Artiodactyla	Bovidae	Pantholops	hodgsoni		L inferred	Chiru-males	55000	0.94	1.4
Artiodactyla	Bovidae	Pantholops	hodgsoni		L inferred	Chiru-females	25000	0.73	1.3
Artiodactyla	Bovidae	Pantholops	hodgsoni		L inferred	Chiru-females	30000	0.73	1.4
Artiodactyla	Bovidae	Saiga	tatarica			Saiga	26000	0.6	1	1206
Artiodactyla	Bovidae	Saiga	tatarica			Saiga	69000	0.8	1.4
Artiodactyla	Bovidae	Pseudoryx	nghetinhensis		W about	Vu Quang Ox	100000	0.8	1.5	1207
Artiodactyla	Bovidae	Pseudoryx	nghetinhensis		W about	Vu Quang Ox	100000	0.9	2
Artiodactyla	Bovidae	Capricornis	all 3			Serows	50000	0.85	1.4	1209
Artiodactyla	Bovidae	Capricornis	all 3			Serows	140000	0.94	1.8
Artiodactyla	Bovidae	Naemorhedus	all 3			Gorals	22000	0.57	0.82	1210
Artiodactyla	Bovidae	Naemorhedus	all 3			Gorals	35000	0.758	1.3
Artiodactyla	Bovidae	Oreamnos	americanus			Mountain Goat	46000	0.9	1.2	1212
Artiodactyla	Bovidae	Oreamnos	americanus			Mountain Goat	140000	1.2	1.6
Artiodactyla	Bovidae	Rupicaprapyrenaica,rupricapra				Chamois	24000	0.76	0.9	1213
Artiodactyla	Bovidae	Rupicaprapyrenaica,rupricapra				Chamois	50000	0.81	1.3
Artiodactyla	Bovidae	Budorcas	taxicolor			Takin	150000	0.686	1	1215
Artiodactyla	Bovidae	Budorcas	taxicolor			Takin	400000	1.4	2.37
Artiodactyla	Bovidae	Ovibos	moschatus			Muskox	200000	1.2	1.9	1215
Artiodactyla	Bovidae	Ovibos	moschatus			Muskox	410000	1.51	2.3
Artiodactyla	Bovidae	Hemitragus	all 3			Tahrs	50000	0.61	0.9	1219
Artiodactyla	Bovidae	Hemitragus	all 3			Tahrs	100000	1.06	1.4
Artiodactyla	Bovidae	Capra	aegagrus			Wild Goat	25000	0.7	1.2	1220
Artiodactyla	Bovidae	Capra	aegagrus			Wild Goat	95000	1	1.6
Artiodactyla	Bovidae	Capra	ibex			Ibex	35000	0.65	1.15	1222
Artiodactyla	Bovidae	Capra	ibex			Ibex	150000	1.05	1.7
Artiodactyla	Bovidae	Capra	caucasica			West Caucasian Tur-males	65000	0.95	1.5	1224
Artiodactyla	Bovidae	Capra	caucasica			West Caucasian Tur-males	100000	1.09	1.65
Artiodactyla	Bovidae	Capra	caucasica			West Caucasian Tur-females	50000	0.78	1.2
Artiodactyla	Bovidae	Capra	caucasica			West Caucasian Tur-females	60000	0.9	1.4
Artiodactyla	Bovidae	Capra	cylindricornis			East Caucasian Tur-male	55000	0.79	1.3	1224
Artiodactyla	Bovidae	Capra	cylindricornis			East Caucasian Tur-male	100000	0.98	1.5
Artiodactyla	Bovidae	Capra	cylindricornis			East Caucasian Tur-female	45000	0.65	Not reported
Artiodactyla	Bovidae	Capra	cylindricornis			East Caucasian Tur-female	55000	0.7	Not reported
Artiodactyla	Bovidae	Capra	Pyrenaica			Spanish Ibex	35000	0.65	1	1226
Artiodactyla	Bovidae	Capra	Pyrenaica			Spanish Ibex	80000	0.75	1.4
Artiodactyla	Bovidae	Capra	falconeri			Markhor	32000	0.65	1.4	1227
Artiodactyla	Bovidae	Capra	falconeri			Markhor	50000	1.04	1.8
Artiodactyla	Bovidae	Pseudois	nayaur,schaeferi			Bharals	25000	0.75	1.15	1228
Artiodactyla	Bovidae	Pseudois	nayaur,schaeferi			Bharals	80000	0.91	1.65
Artiodactyla	Bovidae	Ammotragus	lervia			Aoudad	40000	0.75	1.3	1229
Artiodactyla	Bovidae	Ammotragus	lervia				145000	1.12	1.65
Artiodactyla	Bovidae	Ovis	all 7			Sheep	20000	0.65	1.2	1231
Artiodactyla	Bovidae	Ovis	all 7			Sheep	200000	1.27	1.8
