# Supplementary material for: An explanation of the relationship between mass, metabolic rate and characteristic length for placental mammals
Source: PeerJ. 2015 Sep 3;3:e1228. doi: 10.7717/peerj.1228 (PMC4562252; doi:10.7717/peerj.1228)
Supplement: Data S3 [file peerj-03-1228-s003.xls]

## Sheet: Sheet1
Mass, forearm length, wing span, head and body length from Nowak RM. (1999) Walker's Mammals of the World . Baltimore: John Hopkins.
					Common		Forearm	Wing		Page
Order	Family	Genus	Species	Notes	Name	Mass (g)	Length(mm)	Span(mm)	Length(mm)	Number
						W	l		L
Chiroptera	Pteropodidae	Eidolon	helvum,dupreanum	?avg female mass	Straw-colored Fruit Bats	295	109	no	143	260
Chiroptera	Pteropodidae	Eidolon	helvum,dupreanum	?avg male mass	Straw-colored Fruit Bats	280	132	762	215
Chiroptera	Pteropodidae	Rousettus	all 9	min mass	Rousette Fruit Bats	45	65	no	95	261
Chiroptera	Pteropodidae	Rousettus	all 9	max mass	Rousette Fruit Bats	171	103	no	177
Chiroptera	Pteropodidae	Boneia	bidens		Not Reported	150	94.3		138	263
Chiroptera	Pteropodidae	Boneia	bidens		Not Reported	194	103.5		138
Chiroptera	Pteropodidae	Myonycteris	all 3		Little Collared Fruit Bats	27	55	no	85	263
Chiroptera	Pteropodidae	Myonycteris	all 3		Little Collared Fruit Bats	54	70	no	165
Chiroptera	Pteropodidae	Pteropus	all 60	min mass	Flying Foxes	104	85	610	170	267
Chiroptera	Pteropodidae	Pteropus	all 60	max mass	Flying Foxes	1600	228	1700	406
Chiroptera	Pteropodidae	Acerodon	all 6		Not Reported	450	125	no	178	271
Chiroptera	Pteropodidae	Acerodon	all 6		Not Reported	1140	203	1700	290
Chiroptera	Pteropodidae	Neopteryx	frostii	male	Not Reported	190	110.6	no	105	272
Chiroptera	Pteropodidae	Pteralopex	all 4		Not Reported	241	111	no	162	273
Chiroptera	Pteropodidae	Pteralopex	all 4		Not Reported	506	169	no	275
Chiroptera	Pteropodidae	Styloctenium	wallacei		Not Reported	174	90	no	152	273
Chiroptera	Pteropodidae	Styloctenium	wallacei		Not Reported	218	103	no	178
Chiroptera	Pteropodidae	Dobsonia	all 14		Bare-backed Fruit Bats	68	74	no	102	274
Chiroptera	Pteropodidae	Dobsonia	all 14		Bare-backed Fruit Bats	600	161	no	242
Chiroptera	Pteropodidae	Aproteles	bulmerae	female	Not Reported	600	166	no	242	276
Chiroptera	Pteropodidae	Harpyionycteris	whitehedi,celebensis		Harpy Fruit Bats	83	82	no	140	277
Chiroptera	Pteropodidae	Harpyionycteris	whitehedi,celebensis		Harpy Fruit Bats	142	92	no	153
Chiroptera	Pteropodidae	Hypsignathus	monstrosus	avg female	Hammer-headed Fruit Bat	234	118	no	193	278
Chiroptera	Pteropodidae	Hypsignathus	monstrosus	avg male	Hammer-headed Fruit Bat	420	137	907	304
Chiroptera	Pteropodidae	Epomops	all 3		Epauleted Bats	97	74	no	135	280
Chiroptera	Pteropodidae	Epomops	all 3		Epauleted Bats	144	102	no	180
Chiroptera	Pteropodidae	Epomorphorus	all 7		Epauleted Fruit Bats	40	60	no	125	281
Chiroptera	Pteropodidae	Epomorphorus	all 7	male	Epauleted Fruit Bats	120	100	508	250
Chiroptera	Pteropodidae	Micropteropus	pusillus,intermedius	avg male mass	Dwarf Epauleted Bats	20	46		67	282
Chiroptera	Pteropodidae	Micropteropus	pusillus,intermedius	avg female mass	Dwarf Epauleted Bats	22	65		105
Chiroptera	Pteropodidae	Nanonycteris	veldkampi		Little Flying Cow	19	43		54	283
Chiroptera	Pteropodidae	Nanonycteris	veldkampi		Little Flying Cow	33	54		75
Chiroptera	Pteropodidae	Scotonycteris	zenkeri		Not Reported	19	47		65	284
Chiroptera	Pteropodidae	Scotonycteris	zenkeri		Not Reported	27	56		80
Chiroptera	Pteropodidae	Scotonycteris	ophiodon		Not Reported	65	75		104	284
Chiroptera	Pteropodidae	Scotonycteris	ophiodon		Not Reported	72	88		143
Chiroptera	Pteropodidae	Casinycteris			Not Reported	26	50		90	285
Chiroptera	Pteropodidae	Casinycteris			Not Reported	30	63		95
Chiroptera	Pteropodidae	Cynopterus	all 4		Short-nosed Fruit Bats	25	55	305	70	286
Chiroptera	Pteropodidae	Cynopterus	all 4		Short-nosed Fruit Bats	100	92	457	127
Chiroptera	Pteropodidae	Megaerops	all 4		Not Reported	20	49		76	287
Chiroptera	Pteropodidae	Megaerops	all 4		Not Reported	38	59		102
Chiroptera	Pteropodidae	Pteropodide	jagori		Not Reported	61	72		90	288
Chiroptera	Pteropodidae	Pteropodide	jagori		Not Reported	102	90		130
Chiroptera	Pteropodidae	Dyacopterus	spadiceus		Dyak Fruit Bat	70	76		107	288
Chiroptera	Pteropodidae	Dyacopterus	spadiceus		Dyak Fruit Bat	100	92		152
Chiroptera	Pteropodidae	Chironax	melanocephalus		Black-capped Fruit Bat	12	40		65	289
Chiroptera	Pteropodidae	Chironax	melanocephalus		Black-capped Fruit Bat	17	50		70
Chiroptera	Pteropodidae	Thoopterus	nigrescens		Short-nosed Fruit Bats	67	70		94	290
Chiroptera	Pteropodidae	Thoopterus	nigrescens		Short-nosed Fruit Bats	99	82		109
Chiroptera	Pteropodidae	Balionycteris	maculata		Spotted-winged Fruit Bat	9.5	39		50	291
Chiroptera	Pteropodidae	Balionycteris	maculata		Spotted-winged Fruit Bat	14.5	43		66
Chiroptera	Pteropodidae	Aethalops	alecto		Pygmy Fruit Bat	19.3	42		65	291
Chiroptera	Pteropodidae	Aethalops	alecto		Pygmy Fruit Bat	19.3	52		73
Chiroptera	Pteropodidae	Penthetor	lucasi		Dusky Fruit Bat	30	57		114	292
Chiroptera	Pteropodidae	Penthetor	lucasi		Dusky Fruit Bat	55	67		114
Chiroptera	Pteropodidae	Haplonycteris	fischeri		Fischer's Pygmy Fruit Bat	16	44		68	292
Chiroptera	Pteropodidae	Haplonycteris	fischeri		Fischer's Pygmy Fruit Bat	21	53		80
Chiroptera	Pteropodidae	Otopteropus			Not Reported	12	41		55	294
Chiroptera	Pteropodidae	Otopteropus			Not Reported	21	52		87
Chiroptera	Pteropodidae	Alionycteris	paucidenta		Not Reported	14	45		64	295
Chiroptera	Pteropodidae	Alionycteris	paucidenta		Not Reported	18	50		70
Chiroptera	Pteropodidae	Nyctimene	all 13		Tube-nosed Fruit Bats	22	50		68	296
Chiroptera	Pteropodidae	Nyctimene	all 13		Tube-nosed Fruit Bats	93	86		136
Chiroptera	Pteropodidae	Para nyctimene	raptor		Lesser Tube-nosed Fruit Bats	22	48		63	298
Chiroptera	Pteropodidae	Para nyctimene	raptor		Lesser Tube-nosed Fruit Bats	33	54		93
Chiroptera	Pteropodidae	Eonycteris	spelaea		Dawn Bat	67	60		85	299
Chiroptera	Pteropodidae	Eonycteris	spelaea		Dawn Bat	57	85		125
Chiroptera	Pteropodidae	Macroglossus	minimus, sobrinus	min mass	Long-tongued Fruit Bats	12	36		60	302
Chiroptera	Pteropodidae	Macroglossus	minimus, sobrinus	max mass	Long-tongued Fruit Bats	23	49		85
Chiroptera	Pteropodidae	Syconycteris	australis,hobbit	min mass	Blossom Bats	11.5	38		50	302
Chiroptera	Pteropodidae	Syconycteris	australis,hobbit	max mass	Blossom Bats	25	50		75
Chiroptera	Pteropodidae	Syconycteris	carolinae		Blossom Bats	35	56		83	303
Chiroptera	Pteropodidae	Syconycteris	carolinae		Blossom Bats	47	62		98
Chiroptera	Pteropodidae	Melonycteris	all 3		Not Reported	25	42		77	303
Chiroptera	Pteropodidae	Melonycteris	all 3		Not Reported	61	65		106
Chiroptera	Pteropodidae	Notopteris	macdonaldi	female mass	Long-tailed Fruit Bat	51	59		93	305
Chiroptera	Pteropodidae	Notopteris	macdonaldi	male mass	Long-tailed Fruit Bat	61	69		110
Chiroptera	Rhinopomatidae	Rhinopoma	all 4		Mouse-tailed Bats	6	45		53	305
Chiroptera	Rhinopomatidae	Rhinopoma	all 4		Mouse-tailed Bats	14	75		90
Chiroptera	Emballonuridae	Taphozous	all 13		Tomb Bats	10	50		62	307
Chiroptera	Emballonuridae	Taphozous	all 13		Tomb Bats	50	75		100
Chiroptera	Emballonuridae	Saccolaimus	peli		Not Reported	92	84		110	309
Chiroptera	Emballonuridae	Saccolaimus	peli		Not Reported	105	97		157
Chiroptera	Emballonuridae	Saccolaimus	saccoliamus,flaviventris,mixtus		Not Reported	30	62		72	309
Chiroptera	Emballonuridae	Saccolaimus	saccoliamus,flaviventris,mixtus		Not Reported	60	80		100
Chiroptera	Emballonuridae	Mosia	nigrescens		Lesser Sheath-tailed Bat	2.5	31		32	310
Chiroptera	Emballonuridae	Mosia	nigrescens		Lesser Sheath-tailed Bat	4.1	36		41
Chiroptera	Emballonuridae	Emballonuridae		alt mass	Old World Sheath-tailed Bats	4	30		38	310
Chiroptera	Emballonuridae	Emballonuridae		alt mass	Old World Sheath-tailed Bats	8	53		62
Chiroptera	Emballonuridae	Coleura	seychellensis		African and Arabian Sheath-tailed Bats	10.2	45		55	312
Chiroptera	Emballonuridae	Coleura	seychellensis		African and Arabian Sheath-tailed Bats	11.1	56		65
Chiroptera	Emballonuridae	Rhynchonycteris	naso		Proboscis Bat	2.1	35		37	313
Chiroptera	Emballonuridae	Rhynchonycteris	naso		Proboscis Bat	4.3	41		43
Chiroptera	Emballonuridae	Balantioptryx	all 3		Least Sac-winged Bats	4	35		48	315
Chiroptera	Emballonuridae	Balantioptryx	all 3		Least Sac-winged Bats	9	49		55
Chiroptera	Emballonuridae	Saccopteryx	all 4		White-lined Bats	3	35		37	316
Chiroptera	Emballonuridae	Saccopteryx	all 4		White-lined Bats	11	52		55
Chiroptera	Emballonuridae	Cormura	brevirostris	avg male	Wagner's Sac-winged Bat	8.6	43		50	317
Chiroptera	Emballonuridae	Cormura	brevirostris	avg female	Wagner's Sac-winged Bat	10.2	50		60
Chiroptera	Emballonuridae	Peropteryx	all 4	min mass	Doglike Bats	3.6	38		45	318
Chiroptera	Emballonuridae	Peropteryx	all 4	max mass	Doglike Bats	11	54		55
Chiroptera	Emballonuridae	Diclidurus	all 4	min mass	Ghost Bats	12.9	45		50	320
Chiroptera	Emballonuridae	Diclidurus	all 4	max mass	Ghost Bats	16.2	73		80
Chiroptera	Craseonycteridae	Craseonycteris	thonglongyai		Kitti's Hog-nosed Bat	2	22		29	320
Chiroptera	Craseonycteridae	Craseonycteris	thonglongyai		Kitti's Hog-nosed Bat	2	26		33
Chiroptera	Nycteridae	Nycteris	all 13		Slit-faced Bats	10	32		40	322
Chiroptera	Nycteridae	Nycteris	all 13		Slit-faced Bats	43	64		93
Chiroptera	Megadermatidae	Macroderma	gigas		Australian Giant False Vampire Bat	130	105		100	325
Chiroptera	Megadermatidae	Macroderma	gigas	max mass	Australian Giant False Vampire Bat	216	115	600	140
Chiroptera	Megadermatidae	Cardiodermacor			African False Vampire Bat	21	54		70	326
Chiroptera	Megadermatidae	Cardiodermacor			African False Vampire Bat	35	59		77
Chiroptera	Megadermatidae	Megaderma	spasma,lyra	min mass	Asian False Vampire Batts	23	50		65	327
Chiroptera	Megadermatidae	Megaderma	spasma,lyra	max mass	Asian False Vampire Batts	60	75		95
Chiroptera	Megadermatidae	Lavia	frons		African Yellow-winged Bat	28	49		58	327
Chiroptera	Megadermatidae	Lavia	frons		African Yellow-winged Bat	36	63		80
Chiroptera	Rhinolophidae	Rhinolophus	all 62	min mass	Horseshoe Bats	4	30		35	331
Chiroptera	Rhinolophidae	Rhinolophus	all 62	max mass	Horseshoe Bats	28	75		110
Chiroptera	Hipposideridae	Hipposideros	all 57	min mass	Old World Leaf-nosed Bats	7	33		35	333
Chiroptera	Hipposideridae	Hipposideros	all 57	max mass	Old World Leaf-nosed Bats	180	105		110
Chiroptera	Hipposideridae	Asellia	tridens		Trident Leaf-nosed Bats	6	43		46	337
Chiroptera	Hipposideridae	Asellia	tridens		Trident Leaf-nosed Bats	10	56		62
Chiroptera	Hipposideridae	Anthops	ornatus	male	Flower-faced Bat	8	51		50	338
Chiroptera	Hipposideridae	Aselliscus	stoliczkanus,tricuspidatus	min mass	Tate's Trident-nosed Bats	3.5	35		38	339
Chiroptera	Hipposideridae	Aselliscus	stoliczkanus,tricuspidatus	max mass	Tate's Trident-nosed Bats	8	45		45
Chiroptera	Hipposideridae	Rhinonycteris	aurantius	avg male	Golden Horseshoe Bat	7.6	47		45	339
Chiroptera	Hipposideridae	Rhinonycteris	aurantius	avg female	Golden Horseshoe Bat	8.4	50		53
Chiroptera	Hipposideridae	Triaenops	furculus,persicus		Triple Nose-leaf Bats	8	45		35	341
Chiroptera	Hipposideridae	Triaenops	furculus,persicus		Triple Nose-leaf Bats	15	55		62
Chiroptera	Hipposideridae	Cloeotis	percivali		African Trident-nosed Bat	3.8	30		33	341
Chiroptera	Hipposideridae	Cloeotis	percivali		African Trident-nosed Bat	5.9	36		50
Chiroptera	Hipposideridae	Coelops	frithii,robinsoni	min mass	Not reported	6	33		28	342
Chiroptera	Hipposideridae	Coelops	frithii,robinsoni	max mass	Not reported	9	47		50
Chiroptera	Hipposideridae	Paracoelops	megalotis		Not reported	7	42		45	343
Chiroptera	Mormoopidae	Pteronotus	all 6	min mass	Naked-backed Bats	6.9	35		40	344
Chiroptera	Mormoopidae	Pteronotus	all 6	max mass	Naked-backed Bats	20.4	65		77
Chiroptera	Mormoopidae	Mormoops	blainvillii,megalophylla		Leaf-chinned Bats	12	45		50	346
Chiroptera	Mormoopidae	Mormoops	blainvillii,megalophylla		Leaf-chinned Bats	18	61		73
Chiroptera	Noctilionidae	Noctilio	leporinus		Bulldog Bats	50	70		98	347
Chiroptera	Noctilionidae	Noctilio	leporinus		Bulldog Bats	90	92		132
Chiroptera	Noctilionidae	Noctilio	albiventris		Bulldog Bats	18	54		57
Chiroptera	Noctilionidae	Noctilio	albiventris		Bulldog Bats	44	70		85
Chiroptera	Phyllostomidae	Desmodus	rotundus		Common Vampire Bat	15	50		70	353
Chiroptera	Phyllostomidae	Desmodus	rotundus		Common Vampire Bat	50	63		90
Chiroptera	Phyllostomidae	Diaemusyoungi			White-winged Vampire Bat	30	50		85	355
Chiroptera	Phyllostomidae	Diaemusyoungi			White-winged Vampire Bat	45	56		85
Chiroptera	Phyllostomidae	Diphylla	ecaudate	min mass	Hairy-legged Vampire Bat	25.5	50		65	356
Chiroptera	Phyllostomidae	Diphylla	ecaudate	max mass	Hairy-legged Vampire Bat	24.4	56		93
Chiroptera	Phyllostomidae	Macrotus	waterhousii,californicus		Big-eared Bats	12	45		50	356
Chiroptera	Phyllostomidae	Macrotus	waterhousii,californicus		Big-eared Bats	20	58		69
Chiroptera	Phyllostomidae	Micronnycteris	all 11		Little Big-eared Bats	4	31		42	359
Chiroptera	Phyllostomidae	Micronnycteris	all 11		Little Big-eared Bats	16	57		69
Chiroptera	Phyllostomidae	Vampyrum	spectrum		Linnaeus's False Vampire Bat	145	100	762	125	359
Chiroptera	Phyllostomidae	Vampyrum	spectrum		Linnaeus's False Vampire Bat	190	108	914	135
Chiroptera	Phyllostomidae	Trachops	cirrhosus	avg mass	Frog-eating Bat	32.3	57		76	360
Chiroptera	Phyllostomidae	Trachops	cirrhosus	avg mass	Frog-eating Bat	32.3	64		88
Chiroptera	Phyllostomidae	Chrotopterus	auritus	male mass	Peter's Wolly False Vampire Bat	72.7	75		100	361
Chiroptera	Phyllostomidae	Chrotopterus	auritus	female mass	Peter's Wolly False Vampire Bat	90.5	87		112
Chiroptera	Phyllostomidae	Phylloderma	stenops	avg mass	Peter's Spear-nosed Bat	47	67		85	362
Chiroptera	Phyllostomidae	Phylloderma	stenops	avg mass	Peter's Spear-nosed Bat	47	80		120
Chiroptera	Phyllostomidae	Phyllostomus	latifolius,hastatus,elongatus		Spear-nosed Bats	50	83		100	362
Chiroptera	Phyllostomidae	Phyllostomus	latifolius,hastatus,elongatus		Spear-nosed Bats	142	97	457	130
Chiroptera	Phyllostomidae	Phyllostomus	discolor		Spear-nosed Bats	20	55		75	362
Chiroptera	Phyllostomidae	Phyllostomus	discolor		Spear-nosed Bats	40	65		75
Chiroptera	Phyllostomidae	Tonatia	all 7		Round-eared Bats	9	32		42	365
Chiroptera	Phyllostomidae	Tonatia	all 7		Round-eared Bats	35	60		82
Chiroptera	Phyllostomidae	Mimon	bennettii,crenulatum	min mass	Gray's Spear-nose Bats	12	48		50	366
Chiroptera	Phyllostomidae	Mimon	bennettii,crenulatum	max mass	Gray's Spear-nose Bats	22.9	57		75
Chiroptera	Phyllostomidae	Lonchorhina	all 4		Sword-nosed Bats	8.7	41		51	366
Chiroptera	Phyllostomidae	Lonchorhina	all 4		Sword-nosed Bats	14.5	59		74
Chiroptera	Phyllostomidae	Macrophyllum	Macrophyllum		Long-legged Bat	6	34		43	367
Chiroptera	Phyllostomidae	Macrophyllum	Macrophyllum		Long-legged Bat	9	45		62
Chiroptera	Phyllostomidae	Glossophaga	all 57		Not reported	9.3	32		48	369
Chiroptera	Phyllostomidae	Glossophaga	all 57		Not reported	10.5	42		65
Chiroptera	Phyllostomidae	Monophyllus	redmanii,plethodon	min mass	Not reported	8	35		50	370
Chiroptera	Phyllostomidae	Monophyllus	redmanii,plethodon	max mass	Not reported	17.2	45		80
Chiroptera	Phyllostomidae	Leptonycteris	nivalis,curasoae		Saussure's Lon-nosed Bats	18	46		70	371
Chiroptera	Phyllostomidae	Leptonycteris	nivalis,curasoae		Saussure's Lon-nosed Bats	30	57		95
Chiroptera	Phyllostomidae	Lonchophylla	all 8		Not reported	8.5	30		45	372
Chiroptera	Phyllostomidae	Lonchophylla	all 8		Not reported	16.3	48		65
Chiroptera	Phyllostomidae	Anoura	all 57	min mass	Geoffroy's Long-nosed Bats	7.5	34		50	373
Chiroptera	Phyllostomidae	Anoura	all 57	max mass	Geoffroy's Long-nosed Bats	23	48		90
Chiroptera	Phyllostomidae	Lichonycteris	obscura		Not reported	5	33		50	375
Chiroptera	Phyllostomidae	Lichonycteris	obscura	min mass	Not reported	8	33		55
Chiroptera	Phyllostomidae	Hylonycteris	underwoodi	max mass	Underwood's Long-tounged Bat	6	31		49	376
Chiroptera	Phyllostomidae	Hylonycteris	underwoodi		Underwood's Long-tounged Bat	9	36		72
Chiroptera	Phyllostomidae	Choeroniscus	all 4		Not reported	5	32		50	377
Chiroptera	Phyllostomidae	Choeroniscus	all 4		Not reported	9	38		55
Chiroptera	Phyllostomidae	Choeronycteris	mexicana		Mexican Long-nosed Bat	10	43		55	378
Chiroptera	Phyllostomidae	Choeronycteris	mexicana		Mexican Long-nosed Bat	20	47		80
Chiroptera	Phyllostomidae	Brachyphylla	cavernarum,nana		Not reported	45	51		65	380
Chiroptera	Phyllostomidae	Brachyphylla	cavernarum,nana		Not reported	67	69		118
Chiroptera	Phyllostomidae	Phyllonycteris	all 4	min mass	Not reported	14	43		64	383
Chiroptera	Phyllostomidae	Phyllonycteris	all 4	max mass	Not reported	21.1	50		83
Chiroptera	Phyllostomidae	Carollia	all 4		Short-tailed Leaf-nosed Bats	10	34		48	384
Chiroptera	Phyllostomidae	Carollia	all 4		Short-tailed Leaf-nosed Bats	20	45		65
Chiroptera	Phyllostomidae	Rhinophylla	all 3		Not reported	9	29		43	385
Chiroptera	Phyllostomidae	Rhinophylla	all 3		Not reported	16	37		58
Chiroptera	Phyllostomidae	Sturnira	all 13	min mass	Yellow-shouldered Bats	15	34		51	386
Chiroptera	Phyllostomidae	Sturnira	all 13	max mass	Yellow-shouldered Bats	67.1	61		101
Chiroptera	Phyllostomidae	Uroderma	bilobatum		Tent-building Bats	13	39		54	388
Chiroptera	Phyllostomidae	Uroderma	bilobatum		Tent-building Bats	21	45		74
Chiroptera	Phyllostomidae	Platyrrhinus	all 10	min mass	White-lined Bats	14	36		48	389
Chiroptera	Phyllostomidae	Platyrrhinus	all 10	max mass	White-lined Bats	54.7	64		98
Chiroptera	Phyllostomidae	Vampyrodes	caraccioli		Great Stripe-faced Bat	30	45		65	390
Chiroptera	Phyllostomidae	Vampyrodes	caraccioli		Great Stripe-faced Bat	40	57		77
Chiroptera	Phyllostomidae	Vanpyressa	all 57		Yellow-eared Bats	9	30		43	392
Chiroptera	Phyllostomidae	Vanpyressa	all 57		Yellow-eared Bats	12	38		65
Chiroptera	Phyllostomidae	Mesophylla	maconnelli		Little Yellow-faced Bat	5	29		40	393
Chiroptera	Phyllostomidae	Mesophylla	maconnelli		Little Yellow-faced Bat	9	34		50
Chiroptera	Phyllostomidae	Chiroderma	all 5		Big-eyed Bats	14	37		55	394
Chiroptera	Phyllostomidae	Chiroderma	all 5		Big-eyed Bats	22	58		87
Chiroptera	Phyllostomidae	Ectophylla	alba	avg mass	White Bat	7.5	25		35	395
Chiroptera	Phyllostomidae	Ectophylla	alba	avg mass	White Bat	7.5	35		48
Chiroptera	Phyllostomidae	Enchisthenes	hartii		Hart's Little Fruit Bat	17.3	39		60	395
Chiroptera	Phyllostomidae	Dermanura	all 9		Dwarf Fruit Bats	10	34		47	396
Chiroptera	Phyllostomidae	Dermanura	all 9		Dwarf Fruit Bats	22	52		69
Chiroptera	Phyllostomidae	Koopmania	concolor		Not reported	18.2	46.9		59.6	397
Chiroptera	Phyllostomidae	Koopmania	concolor		Not reported	20	48.3		64.1
Chiroptera	Phyllostomidae	Artibeus	all 10		Neotropical Fruit Bats	25	48		70	399
Chiroptera	Phyllostomidae	Artibeus	all 10		Neotropical Fruit Bats	86	75		103
Chiroptera	Phyllostomidae	Ardops	nichollsi		Tree Bat	15	42		50	400
Chiroptera	Phyllostomidae	Ardops	nichollsi		Tree Bat	19	54		73
Chiroptera	Phyllostomidae	Ariteus	flavescens		Jamacian Fig-eating Bat	9.2	40		50	401
Chiroptera	Phyllostomidae	Ariteus	flavescens		Jamacian Fig-eating Bat	13.1	44		67
Chiroptera	Phyllostomidae	Pygoderma	bilabiatum		Ipanema Bat	19	36		53	403
Chiroptera	Phyllostomidae	Pygoderma	bilabiatum		Ipanema Bat	26	46		65
Chiroptera	Phyllostomidae	Ametrida	centurio		Not reported	8	25		35	403
Chiroptera	Phyllostomidae	Ametrida	centurio		Not reported	12.6	33		47
Chiroptera	Phyllostomidae	Sphaeronycteris	toxophyllum		Not reported	14.8	39		57	403
Chiroptera	Phyllostomidae	Centurio	senex		Wrinkle-faced Bat	17	41		55	404
Chiroptera	Phyllostomidae	Centurio	senex		Wrinkle-faced Bat	28	47		70
Chiroptera	Mystacinidae	Mystacina	tuberculata		New Zealand Short-tailed Bats	12	40	300	60	408
Chiroptera	Mystacinidae	Mystacina	tuberculata		New Zealand Short-tailed Bats	15	45		68
Chiroptera	Mystacinidae	Mystacina	robusta	male	New Zealand Short-tailed Bats	25	45		66	408
Chiroptera	Mystacinidae	Mystacina	robusta	female	New Zealand Short-tailed Bats	35	49		61
Chiroptera	Natalidae	Natalus	all 5		Funnel-eared Bats	4	27		35	409
Chiroptera	Natalidae	Natalus	all 5		Funnel-eared Bats	10	41		55
Chiroptera	Furipteridae	Furipterus	horrens		Smoky Bats	3	30		33	410
Chiroptera	Furipteridae	Furipterus	horrens		Smoky Bats	3	40		40
Chiroptera	Thyropteridae	Thyroptera	tricolor		Disk-winged Bats	4.2	27		34	412
Chiroptera	Thyropteridae	Thyroptera	tricolor		Disk-winged Bats	4.2	38		52
Chiroptera	Vespertilioidae	Myotis	all 87	min mass	Little Brown Bats	2.3	28		35	420
Chiroptera	Vespertilioidae	Myotis	all 87	max mass	Little Brown Bats	45	70		100
Chiroptera	Vespertilioidae	Lasionycteris	noctivagans		Silver-haired Bat	6	37		55	423
Chiroptera	Vespertilioidae	Lasionycteris	noctivagans		Silver-haired Bat	14	44		65
Chiroptera	Vespertilioidae	Pipistrellis	all 68		Pipistrelles	3	27		35	428
Chiroptera	Vespertilioidae	Pipistrellis	all 68		Pipistrelles	20	50		62
Chiroptera	Vespertilioidae	Nyctalus	noctula		Noctule Bats	15	40		50	430
Chiroptera	Vespertilioidae	Nyctalus	noctula		Noctule Bats	40	70		100
Chiroptera	Vespertilioidae	Clischropus	tylopus,javanus		Thick-thumbed Bats	3.5	28		40	431
Chiroptera	Vespertilioidae	Clischropus	tylopus,javanus		Thick-thumbed Bats	4.5	35		40
Chiroptera	Vespertilioidae	Laephotis	all 3	min mass	African Long-eared Bats	4.5	32		45	432
Chiroptera	Vespertilioidae	Laephotis	all 3	max mass	African Long-eared Bats	7.7	38		59
Chiroptera	Vespertilioidae	Philetor	brachypteris		Not reported	8	30		52	433
Chiroptera	Vespertilioidae	Philetor	brachypteris		Not reported	13	38		64
Chiroptera	Vespertilioidae	Hesperoptenus	all 5	min mass	Not reported	6.1	25		40	433
Chiroptera	Vespertilioidae	Hesperoptenus	all 5	max mass	Not reported	32	60		75
Chiroptera	Vespertilioidae	Chalinolobus	all 6		Lobe-lipped Bats	4	30		42	434
Chiroptera	Vespertilioidae	Chalinolobus	all 6		Lobe-lipped Bats	18	50		75
Chiroptera	Vespertilioidae	Glauconycteris	all 9	min mass	Butterfly Bats	6	35		35	436
Chiroptera	Vespertilioidae	Glauconycteris	all 9	max mass	Butterfly Bats	15	50		68
Chiroptera	Vespertilioidae	Nycticeius	humeralis		Evening Bats	6	34		45	437
Chiroptera	Vespertilioidae	Nycticeius	humeralis		Evening Bats	12	38		65
Chiroptera	Vespertilioidae	Nycticeinops	schlieffeni		Schieffen's Twilight Bat	6	29		40	437
Chiroptera	Vespertilioidae	Nycticeinops	schlieffeni		Schieffen's Twilight Bat	9	35		56
Chiroptera	Vespertilioidae	Scoteanax	rueppelli		Greater Broad-nosed Bat	25	51		63	438
Chiroptera	Vespertilioidae	Scoteanax	rueppelli		Greater Broad-nosed Bat	35	56		73
Chiroptera	Vespertilioidae	Scotorepens	all 4		Lesser Broad-nosed Bats	6	27		37	439
Chiroptera	Vespertilioidae	Scotorepens	all 4		Lesser Broad-nosed Bats	18	40		65
Chiroptera	Vespertilioidae	Scotoecus	all 3		Not reported	4	28		46	440
Chiroptera	Vespertilioidae	Scotoecus	all 3		Not reported	5	38		48
Chiroptera	Vespertilioidae	Eptesicus	all 19	min mass	Big Brown Bats	8	28		35	440
Chiroptera	Vespertilioidae	Eptesicus	all 19	max mass	Big Brown Bats	30	55		75
Chiroptera	Vespertilioidae	Vestertilio	all 3		Frosted Bats	14	40		55	443
Chiroptera	Vespertilioidae	Vestertilio	all 3		Frosted Bats	14	60		75
Chiroptera	Vespertilioidae	Histiotus	all 4		Big-eared Brown Bats	11	42		48	444
Chiroptera	Vespertilioidae	Histiotus	all 4		Big-eared Brown Bats	14	52		70
Chiroptera	Vespertilioidae	Tylonycteris	pachypus,robustula	min mass	Club-footed Bats	2	22		35	445
Chiroptera	Vespertilioidae	Tylonycteris	pachypus,robustula	max mass	Club-footed Bats	11.2	33		50
Chiroptera	Vespertilioidae	Mimetilus	moloneyi		Moloney's Flat-headed Bat	6	27	175	48	446
Chiroptera	Vespertilioidae	Mimetilus	moloneyi		Moloney's Flat-headed Bat	11.5	31		58
Chiroptera	Vespertilioidae	Rhogeessa	all 8		Rhogeessa Bats	3	25		37	447
Chiroptera	Vespertilioidae	Rhogeessa	all 8		Rhogeessa Bats	10	35		50
Chiroptera	Vespertilioidae	Scotophilus	all 10	min mass	House Bats	15	42		60	449
Chiroptera	Vespertilioidae	Scotophilus	all 10	max mass	House Bats	22	89		117
Chiroptera	Vespertilioidae	Lasiurus	all 15		Hairy-tailed Bats	6	37		50	452
Chiroptera	Vespertilioidae	Lasiurus	all 15		Hairy-tailed Bats	30	58		90
Chiroptera	Vespertilioidae	Otonycteris	hemprichi	male	Desert Long-eared Bat	18	57		73	454
Chiroptera	Vespertilioidae	Otonycteris	hemprichi	male	Desert Long-eared Bat	20	67		81
Chiroptera	Vespertilioidae	Barbastella	barbatellus,leucomelus		Barbastelles	6	35		43	454
Chiroptera	Vespertilioidae	Barbastella	barbatellus,leucomelus		Barbastelles	10	45		60
Chiroptera	Vespertilioidae	Plecotus	all 4		Old World Long-eared Bats	5	34		40	455
Chiroptera	Vespertilioidae	Plecotus	all 4		Old World Long-eared Bats	14	43		53
Chiroptera	Vespertilioidae	Corynorhinus	all 3		American Long-eared Bats	5	35		45	457
Chiroptera	Vespertilioidae	Corynorhinus	all 3		American Long-eared Bats	20	52		70
Chiroptera	Vespertilioidae	Idionycteris	phyllotis		Allen's Big-eared Bat	8	42		50	458
Chiroptera	Vespertilioidae	Idionycteris	phyllotis		Allen's Big-eared Bat	16	49		60
Chiroptera	Vespertilioidae	Euderma	maculatum		Spotted Bat	15	44		60	458
Chiroptera	Vespertilioidae	Euderma	maculatum		Spotted Bat	15	55		77
Chiroptera	Vespertilioidae	Antrozous	pallidus		Pallid Bat	17	45		60	460
Chiroptera	Vespertilioidae	Antrozous	pallidus		Pallid Bat	28	60		85
Chiroptera	Vespertilioidae	Bauerus	dubiaquercus		Van Gelder's Bat	13	48		57	461
Chiroptera	Vespertilioidae	Bauerus	dubiaquercus		Van Gelder's Bat	20	57		75
Chiroptera	Vespertilioidae	Miniopterus	all 11		Long-winged Bats	6	34		40	462
Chiroptera	Vespertilioidae	Miniopterus	all 11		Long-winged Bats	24	79		78
Chiroptera	Vespertilioidae	Murina	all 14	min mass	Tube-nosed Insectivotous Bats	3	28		33	464
Chiroptera	Vespertilioidae	Murina	all 14	max mass	Tube-nosed Insectivotous Bats	10	45		60
Chiroptera	Vespertilioidae	Harpiocephalus	harpia		Hairy-winged Bat	19	40		55	465
Chiroptera	Vespertilioidae	Harpiocephalus	harpia		Hairy-winged Bat	19	54		75
Chiroptera	Vespertilioidae	Kerivoula	all 22	min mass	Painted Bats	4	27		31	467
Chiroptera	Vespertilioidae	Kerivoula	all 22	max mass	Painted Bats	10	46		57
Chiroptera	Vespertilioidae	Nuctophilus	all 9		New Guinean Bats	4	31		38	466
Chiroptera	Vespertilioidae	Nuctophilus	all 9		New Guinean Bats	20	47		75
Chiroptera	Vespertilioidae	Tomopeas	ravus	Length corrected	Not reported	2	31.2		39	469
Chiroptera	Vespertilioidae	Tomopeas	ravus	Length corrected	Not reported	3.5	34.5		40
Chiroptera	Molossidae	Mormopterus	Australian,Cuban species		Little Goblin Bats	6	29		43	472
Chiroptera	Molossidae	Mormopterus	Australian,Cuban species		Little Goblin Bats	19	41		65
Chiroptera	Molossidae	Sauromys	petrophilus		Not reported	9	38		50	473
Chiroptera	Molossidae	Sauromys	petrophilus		Not reported	22	50		85
Chiroptera	Molossidae	Molossops	all 5	min mass	Broad-faced Bats	11	28		40	474
Chiroptera	Molossidae	Molossops	all 5	max mass	Broad-faced Bats	55	51		95
Chiroptera	Molossidae	Neoplatymops	mattogrossensis	avg male	Not reported	6.1	30.1		52.6	475
Chiroptera	Molossidae	Neoplatymops	mattogrossensis	avg female	Not reported	5.4	30.2		51.1
Chiroptera	Molossidae	Tadarida	australis		Free-tailed Bats	25	57		85	478
Chiroptera	Molossidae	Tadarida	australis		Free-tailed Bats	40	63		100
Chiroptera	Molossidae	Tadarida	African species		Free-tailed Bats	14	45		65	478
Chiroptera	Molossidae	Tadarida	African species		Free-tailed Bats	39	66		100
Chiroptera	Molossidae	Tadarida	brasiliensis		Free-tailed Bats	10	36		46	478
Chiroptera	Molossidae	Tadarida	brasiliensis		Free-tailed Bats	15	46		66
Chiroptera	Molossidae	Chaerephon	plicata		Lesser Mastiff Bats	17	40		65	480
Chiroptera	Molossidae	Chaerephon	plicata		Lesser Mastiff Bats	31	50		75
Chiroptera	Molossidae	Chaerephon	jobensis		Lesser Mastiff Bats	20	46		80	480
Chiroptera	Molossidae	Chaerephon	jobensis		Lesser Mastiff Bats	30	52		90
Chiroptera	Molossidae	Chaerephon	African species		Lesser Mastiff Bats	8	35		50	480
Chiroptera	Molossidae	Chaerephon	African species		Lesser Mastiff Bats	26	53		80
Chiroptera	Molossidae	Mops	all 14		Greater Mastiff Bats	7	29		52	481
Chiroptera	Molossidae	Mops	all 14		Greater Mastiff Bats	64	66		121
Chiroptera	Molossidae	Otomops	martiensseni	female	Big-eared Free-tailed Bats	27	49		60	482
Chiroptera	Molossidae	Otomops	martiensseni	male	Big-eared Free-tailed Bats	36	70		103
Chiroptera	Molossidae	Nyctinomops	all 4		New World Free-tailed Bats	13.8	41		54	483
Chiroptera	Molossidae	Nyctinomops	all 4		New World Free-tailed Bats	20.6	64		84
Chiroptera	Molossidae	Eumops	all 8	min mass	Mastiff Bats	7	37		40	484
Chiroptera	Molossidae	Eumops	all 8	max mass	Mastiff Bats	65	83		130
Chiroptera	Molossidae	Promops	centralis,nasutus		Domed-palate Mastiff Bats	14	43		60	485
Chiroptera	Molossidae	Promops	centralis,nasutus		Domed-palate Mastiff Bats	17.2	63		90
Chiroptera	Molossidae	Molossus	all 7		Velvety Free-tailed Bats	10	33		50	487
Chiroptera	Molossidae	Molossus	all 7		Velvety Free-tailed Bats	30	60		95
Chiroptera	Molossidae	Cheiromeles	torquatus,parvidens		Naked Bats	75	70		104	489
Chiroptera	Molossidae	Cheiromeles	torquatus,parvidens		Naked Bats	167	86		145
